# Supplementary material
Source: publisher site journal article supplement (https://www.spandidos-publications.com/501/downloadSupplementary)
Supplement: Supplementary file 2 [file downloadSupplementary]

## Sheet: Sheet1
Table SII.	Signaling pathway enrichment analysis of differentially expressed genes
GroupID	Category	Term	Description	LogP	Log(q-value)	InTerm_InList	Genes	Symbols
1_Summary	Reactome Gene Sets	R-HSA-418594	G alpha (i) signalling events	-6.48369	-2.17232	5/396	1902,4852,5406,6387,6750,3569	LPAR1,NPY,PNLIP,CXCL12,SST,IL6
1_Member	Reactome Gene Sets	R-HSA-418594	G alpha (i) signalling events	-6.48369	-2.17232	5/396	1902,4852,5406,6387,6750	LPAR1,NPY,PNLIP,CXCL12,SST
1_Member	GO Biological Processes	GO:0032103	positive regulation of response to external stimulus	-5.31672	-1.65573	4/292	1902,3569,4852,6387	LPAR1,IL6,NPY,CXCL12
1_Member	Reactome Gene Sets	R-HSA-373076	Class A/1 (Rhodopsin-like receptors)	-5.13808	-1.65573	4/324	1902,4852,6387,6750	LPAR1,NPY,CXCL12,SST
1_Member	Reactome Gene Sets	R-HSA-500792	GPCR ligand binding	-4.55029	-1.28031	4/457	1902,4852,6387,6750	LPAR1,NPY,CXCL12,SST
1_Member	GO Biological Processes	GO:0010469	regulation of signaling receptor activity	-4.26079	-1.08156	4/542	3569,4852,6387,6750	IL6,NPY,CXCL12,SST
1_Member	Reactome Gene Sets	R-HSA-375276	Peptide ligand-binding receptors	-4.20903	-1.08156	3/190	4852,6387,6750	NPY,CXCL12,SST
1_Member	GO Biological Processes	GO:0021537	telencephalon development	-3.90815	-0.994713	3/240	1902,4852,6387	LPAR1,NPY,CXCL12
1_Member	GO Biological Processes	GO:0030900	forebrain development	-3.36196	-0.630376	3/368	1902,4852,6387	LPAR1,NPY,CXCL12
1_Member	GO Biological Processes	GO:0007420	brain development	-2.53965	-0.0916019	3/709	1902,4852,6387	LPAR1,NPY,CXCL12
1_Member	GO Biological Processes	GO:0060322	head development	-2.47038	-0.0455012	3/750	1902,4852,6387	LPAR1,NPY,CXCL12
2_Summary	GO Biological Processes	GO:0060193	positive regulation of lipase activity	-5.58758	-1.65573	3/66	1902,5319,5406,1360,4609,3569	LPAR1,PLA2G1B,PNLIP,CPB1,MYC,IL6
2_Member	GO Biological Processes	GO:0060193	positive regulation of lipase activity	-5.58758	-1.65573	3/66	1902,5319,5406	LPAR1,PLA2G1B,PNLIP
2_Member	GO Biological Processes	GO:0060191	regulation of lipase activity	-5.166	-1.65573	3/91	1902,5319,5406	LPAR1,PLA2G1B,PNLIP
2_Member	KEGG Pathway	hsa04972	Pancreatic secretion	-5.09604	-1.65573	3/96	1360,5319,5406	CPB1,PLA2G1B,PNLIP
2_Member	GO Biological Processes	GO:0051345	positive regulation of hydrolase activity	-3.72313	-0.871911	4/746	1902,4609,5319,5406	LPAR1,MYC,PLA2G1B,PNLIP
2_Member	GO Biological Processes	GO:0010876	lipid localization	-3.3179	-0.608584	3/381	3569,5319,5406	IL6,PLA2G1B,PNLIP
3_Summary	GO Biological Processes	GO:0060326	cell chemotaxis	-5.34643	-1.65573	4/287	1902,3569,5319,6387,4609,4852,9314	LPAR1,IL6,PLA2G1B,CXCL12,MYC,NPY,KLF4
3_Member	GO Biological Processes	GO:0060326	cell chemotaxis	-5.34643	-1.65573	4/287	1902,3569,5319,6387	LPAR1,IL6,PLA2G1B,CXCL12
3_Member	GO Biological Processes	GO:0050921	positive regulation of chemotaxis	-4.76223	-1.45086	3/124	1902,3569,6387	LPAR1,IL6,CXCL12
3_Member	GO Biological Processes	GO:0006875	cellular metal ion homeostasis	-4.21157	-1.08156	4/558	1902,4609,5319,6387	LPAR1,MYC,PLA2G1B,CXCL12
3_Member	GO Biological Processes	GO:0097529	myeloid leukocyte migration	-4.18881	-1.08156	3/193	3569,5319,6387	IL6,PLA2G1B,CXCL12
3_Member	GO Biological Processes	GO:0050920	regulation of chemotaxis	-4.13641	-1.06348	3/201	1902,3569,6387	LPAR1,IL6,CXCL12
3_Member	GO Biological Processes	GO:0006935	chemotaxis	-4.08619	-1.06348	4/601	1902,3569,5319,6387	LPAR1,IL6,PLA2G1B,CXCL12
3_Member	GO Biological Processes	GO:0042330	taxis	-4.08338	-1.06348	4/602	1902,3569,5319,6387	LPAR1,IL6,PLA2G1B,CXCL12
3_Member	GO Biological Processes	GO:0030595	leukocyte chemotaxis	-4.07383	-1.06348	3/211	3569,5319,6387	IL6,PLA2G1B,CXCL12
3_Member	GO Biological Processes	GO:0030003	cellular cation homeostasis	-4.02018	-1.04317	4/625	1902,4609,5319,6387	LPAR1,MYC,PLA2G1B,CXCL12
3_Member	GO Biological Processes	GO:0055065	metal ion homeostasis	-4.01212	-1.04317	4/628	1902,4609,5319,6387	LPAR1,MYC,PLA2G1B,CXCL12
3_Member	GO Biological Processes	GO:0006873	cellular ion homeostasis	-3.98552	-1.03588	4/638	1902,4609,5319,6387	LPAR1,MYC,PLA2G1B,CXCL12
3_Member	GO Biological Processes	GO:0055080	cation homeostasis	-3.83451	-0.938112	4/698	1902,4609,5319,6387	LPAR1,MYC,PLA2G1B,CXCL12
3_Member	GO Biological Processes	GO:0098771	inorganic ion homeostasis	-3.80593	-0.925924	4/710	1902,4609,5319,6387	LPAR1,MYC,PLA2G1B,CXCL12
3_Member	GO Biological Processes	GO:0055082	cellular chemical homeostasis	-3.67238	-0.85749	4/769	1902,4609,5319,6387	LPAR1,MYC,PLA2G1B,CXCL12
3_Member	GO Biological Processes	GO:0050801	ion homeostasis	-3.66371	-0.85749	4/773	1902,4609,5319,6387	LPAR1,MYC,PLA2G1B,CXCL12
3_Member	GO Biological Processes	GO:0070482	response to oxygen levels	-3.45886	-0.700063	3/341	1902,4609,6387	LPAR1,MYC,CXCL12
3_Member	GO Biological Processes	GO:1903532	positive regulation of secretion by cell	-3.37585	-0.632678	3/364	3569,5319,6387	IL6,PLA2G1B,CXCL12
3_Member	GO Biological Processes	GO:0051047	positive regulation of secretion	-3.2818	-0.587231	3/392	3569,5319,6387	IL6,PLA2G1B,CXCL12
3_Member	GO Biological Processes	GO:0007015	actin filament organization	-3.27535	-0.587231	3/394	1902,5319,6387	LPAR1,PLA2G1B,CXCL12
3_Member	GO Biological Processes	GO:0006816	calcium ion transport	-3.22186	-0.55394	3/411	4852,5319,6387	NPY,PLA2G1B,CXCL12
3_Member	GO Biological Processes	GO:0006874	cellular calcium ion homeostasis	-3.15302	-0.494862	3/434	1902,5319,6387	LPAR1,PLA2G1B,CXCL12
3_Member	GO Biological Processes	GO:0055074	calcium ion homeostasis	-3.12426	-0.475649	3/444	1902,5319,6387	LPAR1,PLA2G1B,CXCL12
3_Member	GO Biological Processes	GO:0070838	divalent metal ion transport	-3.09063	-0.451353	3/456	4852,5319,6387	NPY,PLA2G1B,CXCL12
3_Member	GO Biological Processes	GO:0072511	divalent inorganic cation transport	-3.07962	-0.450252	3/460	4852,5319,6387	NPY,PLA2G1B,CXCL12
3_Member	GO Biological Processes	GO:0072503	cellular divalent inorganic cation homeostasis	-3.05521	-0.44338	3/469	1902,5319,6387	LPAR1,PLA2G1B,CXCL12
3_Member	GO Biological Processes	GO:0050900	leukocyte migration	-3.04718	-0.44338	3/472	3569,5319,6387	IL6,PLA2G1B,CXCL12
3_Member	GO Biological Processes	GO:1901652	response to peptide	-3.03392	-0.43855	3/477	5319,6387,9314	PLA2G1B,CXCL12,KLF4
3_Member	GO Biological Processes	GO:0072507	divalent inorganic cation homeostasis	-3.01041	-0.423309	3/486	1902,5319,6387	LPAR1,PLA2G1B,CXCL12
3_Member	GO Biological Processes	GO:0030335	positive regulation of cell migration	-2.99498	-0.416001	3/492	1902,3569,6387	LPAR1,IL6,CXCL12
3_Member	GO Biological Processes	GO:2000147	positive regulation of cell motility	-2.94985	-0.378844	3/510	1902,3569,6387	LPAR1,IL6,CXCL12
3_Member	GO Biological Processes	GO:0051272	positive regulation of cellular component movement	-2.9135	-0.350314	3/525	1902,3569,6387	LPAR1,IL6,CXCL12
3_Member	GO Biological Processes	GO:0040017	positive regulation of locomotion	-2.8759	-0.320399	3/541	1902,3569,6387	LPAR1,IL6,CXCL12
3_Member	GO Biological Processes	GO:0043410	positive regulation of MAPK cascade	-2.84169	-0.293741	3/556	1902,3569,5319	LPAR1,IL6,PLA2G1B
3_Member	GO Biological Processes	GO:0030036	actin cytoskeleton organization	-2.67418	-0.162147	3/636	1902,5319,6387	LPAR1,PLA2G1B,CXCL12
3_Member	GO Biological Processes	GO:0097435	supramolecular fiber organization	-2.63387	-0.148576	3/657	1902,5319,6387	LPAR1,PLA2G1B,CXCL12
3_Member	GO Biological Processes	GO:1903530	regulation of secretion by cell	-2.58581	-0.11954	3/683	3569,5319,6387	IL6,PLA2G1B,CXCL12
3_Member	GO Biological Processes	GO:0030029	actin filament-based process	-2.51383	-0.0716869	3/724	1902,5319,6387	LPAR1,PLA2G1B,CXCL12
3_Member	GO Biological Processes	GO:0051046	regulation of secretion	-2.49357	-0.0630149	3/736	3569,5319,6387	IL6,PLA2G1B,CXCL12
4_Summary	GO Biological Processes	GO:0043408	regulation of MAPK cascade	-5.06402	-1.65573	5/770	1902,3569,4609,5319,9314,6387	LPAR1,IL6,MYC,PLA2G1B,KLF4,CXCL12
4_Member	GO Biological Processes	GO:0043408	regulation of MAPK cascade	-5.06402	-1.65573	5/770	1902,3569,4609,5319,9314	LPAR1,IL6,MYC,PLA2G1B,KLF4
4_Member	KEGG Pathway	hsa05200	Pathways in cancer	-4.79884	-1.45086	4/395	1902,3569,4609,6387	LPAR1,IL6,MYC,CXCL12
4_Member	GO Biological Processes	GO:0051347	positive regulation of transferase activity	-3.93105	-0.999889	4/659	1902,4609,5319,9314	LPAR1,MYC,PLA2G1B,KLF4
4_Member	KEGG Pathway	hsa04151	PI3K-Akt signaling pathway	-3.45513	-0.700063	3/342	1902,3569,4609	LPAR1,IL6,MYC
4_Member	GO Biological Processes	GO:0043065	positive regulation of apoptotic process	-2.70584	-0.179797	3/620	1902,3569,4609	LPAR1,IL6,MYC
4_Member	GO Biological Processes	GO:0043068	positive regulation of programmed cell death	-2.69387	-0.174886	3/626	1902,3569,4609	LPAR1,IL6,MYC
4_Member	GO Biological Processes	GO:0010942	positive regulation of cell death	-2.59126	-0.11954	3/680	1902,3569,4609	LPAR1,IL6,MYC
4_Member	GO Biological Processes	GO:0045596	negative regulation of cell differentiation	-2.53965	-0.0916019	3/709	1902,3569,4609	LPAR1,IL6,MYC
4_Member	GO Biological Processes	GO:0019221	cytokine-mediated signaling pathway	-2.50366	-0.0673454	3/730	3569,4609,6387	IL6,MYC,CXCL12
5_Summary	GO Biological Processes	GO:1902532	negative regulation of intracellular signal transduction	-4.35726	-1.12507	4/512	1902,4609,6387,9314,3569,6750,5319	LPAR1,MYC,CXCL12,KLF4,IL6,SST,PLA2G1B
5_Member	GO Biological Processes	GO:1902532	negative regulation of intracellular signal transduction	-4.35726	-1.12507	4/512	1902,4609,6387,9314	LPAR1,MYC,CXCL12,KLF4
5_Member	GO Biological Processes	GO:0008285	negative regulation of cell proliferation	-3.72089	-0.871911	4/747	3569,4609,6750,9314	IL6,MYC,SST,KLF4
5_Member	GO Biological Processes	GO:1903037	regulation of leukocyte cell-cell adhesion	-3.66999	-0.85749	3/289	3569,6387,9314	IL6,CXCL12,KLF4
5_Member	GO Biological Processes	GO:0007159	leukocyte cell-cell adhesion	-3.53191	-0.739049	3/322	3569,6387,9314	IL6,CXCL12,KLF4
5_Member	GO Biological Processes	GO:0035690	cellular response to drug	-3.45886	-0.700063	3/341	3569,4609,9314	IL6,MYC,KLF4
5_Member	GO Biological Processes	GO:0022407	regulation of cell-cell adhesion	-3.32457	-0.608584	3/379	3569,6387,9314	IL6,CXCL12,KLF4
5_Member	GO Biological Processes	GO:0051090	regulation of DNA-binding transcription factor activity	-3.24047	-0.562571	3/405	3569,5319,9314	IL6,PLA2G1B,KLF4
5_Member	GO Biological Processes	GO:0010975	regulation of neuron projection development	-3.07143	-0.450252	3/463	1902,6387,9314	LPAR1,CXCL12,KLF4
5_Member	GO Biological Processes	GO:0071396	cellular response to lipid	-2.77394	-0.233424	3/587	1902,3569,9314	LPAR1,IL6,KLF4
5_Member	GO Biological Processes	GO:0045664	regulation of neuron differentiation	-2.71187	-0.179797	3/617	1902,6387,9314	LPAR1,CXCL12,KLF4
5_Member	GO Biological Processes	GO:0030155	regulation of cell adhesion	-2.65289	-0.154435	3/647	3569,6387,9314	IL6,CXCL12,KLF4
5_Member	GO Biological Processes	GO:0120035	regulation of plasma membrane bounded cell projection organization	-2.65289	-0.154435	3/647	1902,6387,9314	LPAR1,CXCL12,KLF4
5_Member	GO Biological Processes	GO:0031344	regulation of cell projection organization	-2.63387	-0.148576	3/657	1902,6387,9314	LPAR1,CXCL12,KLF4
5_Member	GO Biological Processes	GO:0080135	regulation of cellular response to stress	-2.62261	-0.143743	3/663	4609,6387,9314	MYC,CXCL12,KLF4
5_Member	GO Biological Processes	GO:0001816	cytokine production	-2.55719	-0.0970769	3/699	3569,5319,9314	IL6,PLA2G1B,KLF4
5_Member	GO Biological Processes	GO:0050767	regulation of neurogenesis	-2.45734	-0.0380587	3/758	1902,6387,9314	LPAR1,CXCL12,KLF4
5_Member	GO Biological Processes	GO:0098609	cell-cell adhesion	-2.43009	-0.0163476	3/775	3569,6387,9314	IL6,CXCL12,KLF4
